# Supplementary material for: Structural and electronic properties of small lithium peroxide clusters in view of the charge process in Li–O2 batteries
Source: Royal Society of Chemistry journal article supplement (doi:10.1039/c9cp03785c), 2019-01-01
Supplement: c9cp03785c1.pdf [file c9cp03785c1.pdf]

## Structural and Electronic Properties of Small Lithium Peroxide

### Clusters in View of Charge Process in Li-O<sub>2</sub> Batteries

Binpeng Hou, Xueling Lei<sup>1</sup>, Zuoliang Gan, Shuying Zhong, Gang Liu, Chuying Ouyang

Department of Physics, Laboratory of Computational Materials Physics, Jiangxi Normal University,  
Nanchang, Jiangxi 330022, China

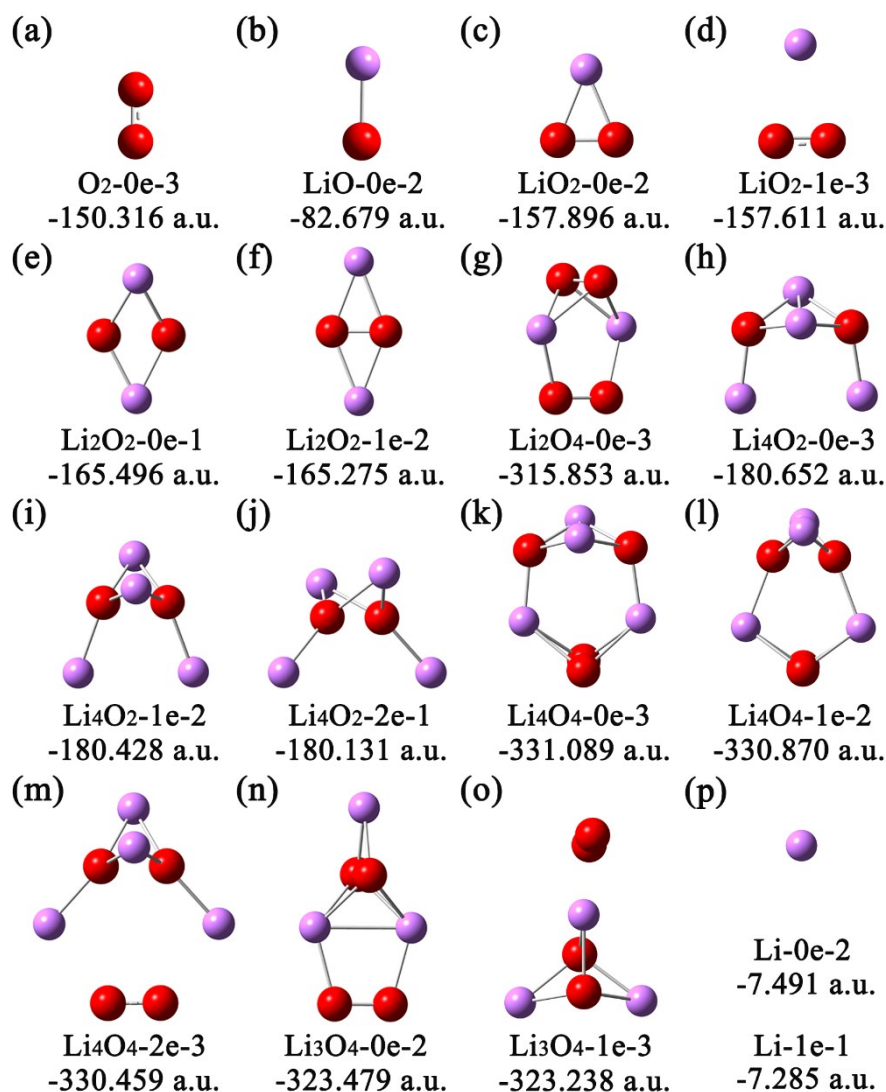

Fig. S-1 Structure and the corresponding total energy (in a.u.) of each non-Li<sub>2</sub>O<sub>2</sub> cluster (Li<sub>x</sub>O<sub>y</sub>-*ne*-*m*). In Li<sub>x</sub>O<sub>y</sub>-*ne*-*m*, the first term represents the chemical formula, the second term *n* represents the number of lost electrons, and the third term *m* represents the spin multiplicity.

<sup>1</sup> Corresponding author: Email: [xueling@mail.ustc.edu.cn](mailto:xueling@mail.ustc.edu.cn)
